# Supplementary material for: Nanocomposites of Fe(II)-Based Metallo-Supramolecular Polymer and a Layered Inorganic–Organic Hybrid for Improved Electrochromic Materials
Source: MDPI journal article supplement (doi:10.3390/polym14050915), 2022-02-25
Supplement: s1 [file s1]

## Supplementary Information

# Nanocomposites of Fe(II)-based metallo-supramolecular polymer and a layered inorganic–organic hybrid for improved electrochromic materials

Kazuko Fujii\*, Manas Kumar Bera, Dines Chandra Santra, and Masayoshi Higuchi\*

Electronic Functional Macromolecules group, National Institute for Materials Science, 1-1 Namiki, Tsukuba, Ibaraki 305-0044, Japan

\* Correspondence: [FUJII.Kazuko@nims.go.jp](mailto:FUJII.Kazuko@nims.go.jp); +81-298604363 (K. F.) and [HIGUCHI.Masayoshi@nims.go.jp](mailto:HIGUCHI.Masayoshi@nims.go.jp); +81-298604744 (M. H.)

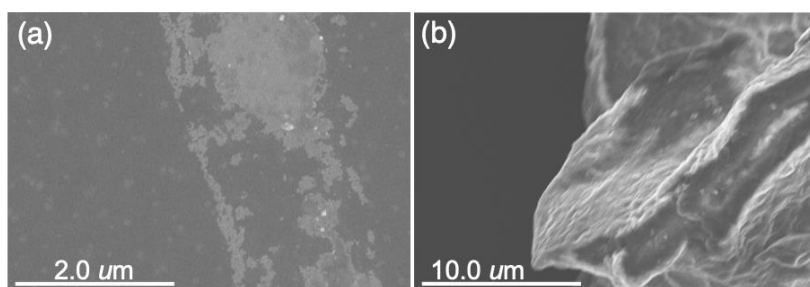

**Figure S1.** SEM images of polyFe.

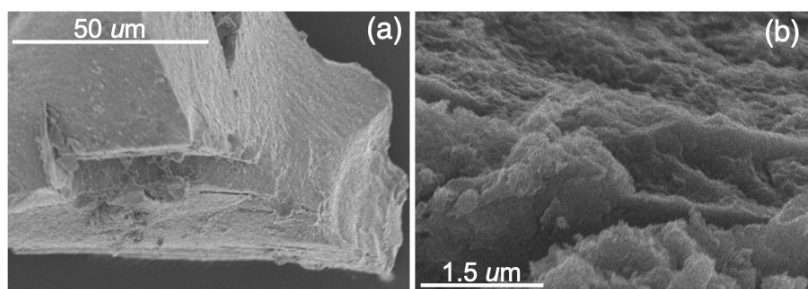

**Figure S2.** SEM images of layered inorganic-imidazoline covalently bonded hybrid (LIIIm).

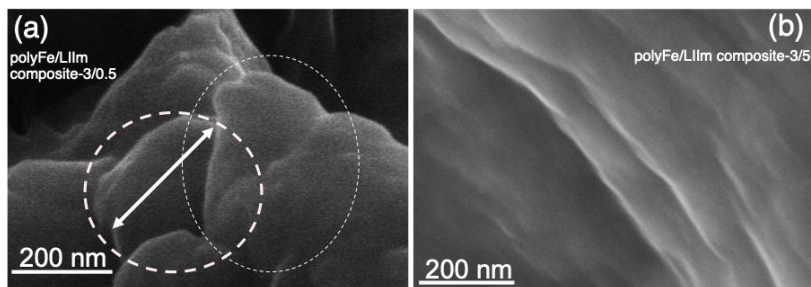

**Figure S3.** SEM images of polyFe/LIIm composites (a) 3/0.5 and (b) 3/5. Some particles and the size are marked with dot circles and a double arrow.

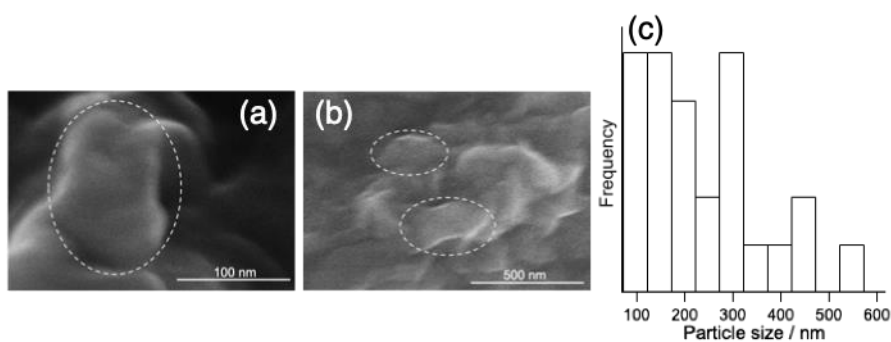

**Figure S4.** (a, b) SEM images of polyFe/LIIm composite-3/1 with different magnifications (some particles are marked with dot circles) and (c) a histogram in the particle size. The average particle sizes in polyFe/LIIm composites-3/0.5, -3/1 and -3/5 were determined using the observable particles, because the particles were heavily stacked and overlapped to form aggregates.

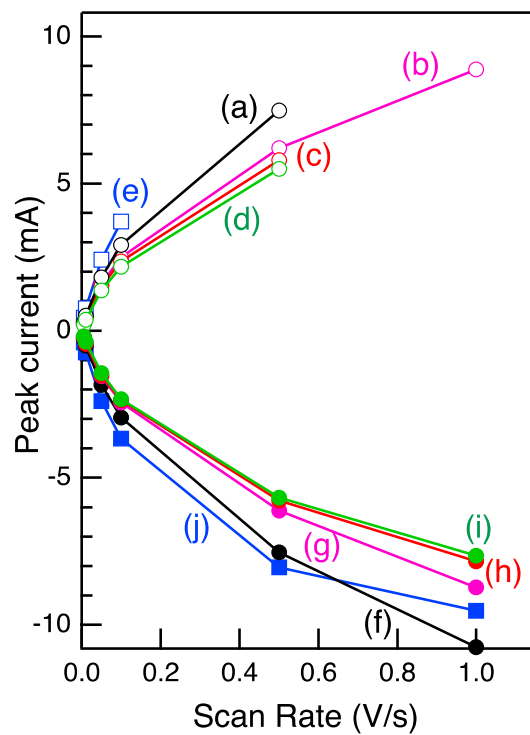

**Figure S5.** CV plots of the oxidation (a–e) and reduction (f–j) current as a function of the scan rates for polyFe/LIIm composites (a and f) 3/0.1, (b and g) 3/0.5, (c and h) 3/1, and (d and i) 3/5 and (e and j) reference polyFe films casted on ITO glass.
